# Supplementary material for: Primate malarias as a model for cross-species parasite transmission
Source: eLife. 2022 Jan 28;11:e69628. doi: 10.7554/eLife.69628 (PMC8798051; doi:10.7554/eLife.69628)
Supplement: Supplementary file 2. — Reported outcomes of tests for nonhuman primate (NHP) Plasmodium parasites sampled in humans. Sample location, method of sampling, sample size, and parasite species re included with original reference. Further details are provided in main text and Section 2. [file elife-69628-supp2.xlsx]

## Sheet: Table_Human_DataBase.csv
Species	Region	Location	Country	N	NoInfected	NoInfBloodDNA	NoInfMicro	NoInfIgG	NoUninfected	PercentInfect	P_inui	P_cynomolgi	P_fieldi	P_knowlesi	P_coatneyi	P_simiovale	P_fragile	P_hylobati	P_youngi	P_jefferyi	P_eylesi	P_pitheci	P_silvaticum	P_simium	P_brasilianum	P_simium/P_vivax	P_brasilianum/P_malariae	P_schwetzi	P_gonderi	P_georgesi	P_petersi	P_praefalciparum	P_falciparum	P_reichenowi	P_billcollinsi	P_blacklocki	P_gaboni	P_alderi	P_malariae*	P_ovale*	P_vivax*	P_foleyi	P_girardi	P_mandrilli	P_billbrayi	P_lomamiensis	P_multiple	P_species	Method
Homo_sapiens	Asia	Sabah	Malaysia	98	98	98	0	0	0	100	0	0	0	98	0	0	0	0	0	0	0	0	0	0	0	0	0	0	0	0	0	0	0	0	0	0	0	0	0	0	0	0	0	0	0	0	0	0	bPCR
Homo_sapiens	Asia	Sarawak	Malaysia	374	374	374	0	0	0	100	0	0	0	374	0	0	0	0	0	0	0	0	0	0	0	0	0	0	0	0	0	0	0	0	0	0	0	0	0	0	0	0	0	0	0	0	0	0	bPCR
Homo_sapiens	Asia	Kelantan	Malaysia	30	30	30	0	0	0	100	0	0	0	30	0	0	0	0	0	0	0	0	0	0	0	0	0	0	0	0	0	0	0	0	0	0	0	0	0	0	0	0	0	0	0	0	0	0	bPCR
Homo_sapiens	Asia	Pahang	Malaysia	50	50	50	0	0	0	100	0	0	0	50	0	0	0	0	0	0	0	0	0	0	0	0	0	0	0	0	0	0	0	0	0	0	0	0	0	0	0	0	0	0	0	0	0	0	bPCR
Homo_sapiens	America	Mavaca	Venezuela	633	75	75	0	0	558	11.8	0	0	0	0	0	0	0	0	0	0	0	0	0	0	12	0	42	0	0	0	0	0	0	0	0	0	0	0	21	0	0	0	0	0	0	0	0	0	bPCR
Homo_sapiens	Asia	Khanh Phu	Vietnam	125	125	125	0	0	0	100	0	0	0	0	0	0	0	0	0	0	0	0	0	0	0	0	0	0	0	0	0	0	53	0	0	0	0	0	1	0	17	0	0	0	0	0	54	0	bPCR
Homo_sapiens	Asia	Sabah	Malaysia	67	67	67	0	0	0	100	0	0	0	67	0	0	0	0	0	0	0	0	0	0	0	0	0	0	0	0	0	0	0	0	0	0	0	0	0	0	0	0	0	0	0	0	0	0	bPCR
Homo_sapiens	Asia	Sarawak	Malaysia	54	54	54	0	0	0	100	0	0	0	54	0	0	0	0	0	0	0	0	0	0	0	0	0	0	0	0	0	0	0	0	0	0	0	0	0	0	0	0	0	0	0	0	0	0	bPCR
Homo_sapiens	Asia	Kelatan	Malaysia	13	13	13	0	0	0	100	0	0	0	13	0	0	0	0	0	0	0	0	0	0	0	0	0	0	0	0	0	0	0	0	0	0	0	0	0	0	0	0	0	0	0	0	0	0	bPCR
Homo_sapiens	Asia	Sarawak	Malaysia	1	1	1	0	0	0	100	0	0	0	1	0	0	0	0	0	0	0	0	0	0	0	0	0	0	0	0	0	0	0	0	0	0	0	0	0	0	0	0	0	0	0	0	0	0	bPCR
Homo_sapiens	Asia	Sabah	Malaysia	49	49	49	0	0	0	100	0	0	0	49	0	0	0	0	0	0	0	0	0	0	0	0	0	0	0	0	0	0	0	0	0	0	0	0	0	0	0	0	0	0	0	0	0	0	bPCR
Homo_sapiens	Asia	Sabang	Malaysia	18	18	18	0	0	0	100	0	0	0	15	0	0	0	0	0	0	0	0	0	0	0	0	0	0	0	0	0	0	0	0	0	0	0	0	0	0	0	0	0	0	0	0	0	3	bPCR
Homo_sapiens	Asia	Pailin Province	Cambodge	7412	698	698	0	0	6714	9.4	0	0	0	1	0	0	0	0	0	0	0	0	0	0	0	0	0	0	0	0	0	0	58	0	0	0	0	0	0	0	445	0	0	0	0	0	9	185	bPCR
Homo_sapiens	Asia	Battambang Province	Cambodge	1000	91	91	0	0	909	9.1	0	0	0	1	0	0	0	0	0	0	0	0	0	0	0	0	0	0	0	0	0	0	7	0	0	0	0	0	0	0	78	0	0	0	0	0	0	5	bPCR
Homo_sapiens	Asia	Battambang Province	Cambodge	6320	572	572	0	0	5748	9	0	11	0	6	0	0	0	0	0	0	0	0	0	0	0	0	0	0	0	0	0	0	49	0	0	0	0	0	0	0	453	0	0	0	0	0	7	46	bPCR
Homo_sapiens	Asia	Sabah	Malaysia	10100	9	9	0	0	10091	0.01	0	0	0	2	0	0	0	0	0	0	0	0	0	0	0	0	0	0	0	0	0	0	0	0	0	0	0	0	3	0	1	0	0	0	0	0	2	1	bPCR
Homo_sapiens	Asia	Sabah	Malaysia	10100	5444	0	0	5444	4656	53.9	0	0	0	515	0	0	0	0	0	0	0	0	0	0	0	0	0	0	0	0	0	0	3272	0	0	0	0	0	0	0	1656	0	0	0	0	0	0	0	bIgG
Homo_sapiens	Asia	Sabah	Malaysia	876	54	54	0	0	822	6.2	0	2	0	3	0	0	0	0	0	0	0	0	0	0	0	0	0	0	0	0	0	0	41	0	0	0	0	0	3	0	1	0	0	0	0	0	0	4	bPCR
Homo_sapiens	Asia	Johor	Malaysia	4	4	4	0	0	0	100	0	0	0	4	0	0	0	0	0	0	0	0	0	0	0	0	0	0	0	0	0	0	0	0	0	0	0	0	0	0	0	0	0	0	0	0	0	0	bPCR
Homo_sapiens	Asia	Kelantan	Malaysia	67	63	63	0	0	4	94	0	0	0	63	0	0	0	0	0	0	0	0	0	0	0	0	0	0	0	0	0	0	0	0	0	0	0	0	0	0	0	0	0	0	0	0	0	0	bPCR
Homo_sapiens	Asia	Melaka	Malaysia	8	6	6	0	0	2	0.75	0	0	0	6	0	0	0	0	0	0	0	0	0	0	0	0	0	0	0	0	0	0	0	0	0	0	0	0	0	0	0	0	0	0	0	0	0	0	bPCR
Homo_sapiens	Asia	Negeri Sembilan	Malaysia	8	6	6	0	0	2	0.75	0	0	0	6	0	0	0	0	0	0	0	0	0	0	0	0	0	0	0	0	0	0	0	0	0	0	0	0	0	0	0	0	0	0	0	0	0	0	bPCR
Homo_sapiens	Asia	Pahang	Malaysia	67	65	65	0	0	2	0.97	0	0	0	65	0	0	0	0	0	0	0	0	0	0	0	0	0	0	0	0	0	0	0	0	0	0	0	0	0	0	0	0	0	0	0	0	0	0	bPCR
Homo_sapiens	Asia	Perak	Malaysia	16	0	0	0	0	16	0	0	0	0	0	0	0	0	0	0	0	0	0	0	0	0	0	0	0	0	0	0	0	0	0	0	0	0	0	0	0	0	0	0	0	0	0	0	0	bPCR
Homo_sapiens	Asia	Pulau Pinang	Malaysia	3	1	1	0	0	2	0.33	0	0	0	1	0	0	0	0	0	0	0	0	0	0	0	0	0	0	0	0	0	0	0	0	0	0	0	0	0	0	0	0	0	0	0	0	0	0	bPCR
Homo_sapiens	Asia	Selangor	Malaysia	14	6	6	0	0	8	0.43	0	0	0	6	0	0	0	0	0	0	0	0	0	0	0	0	0	0	0	0	0	0	0	0	0	0	0	0	0	0	0	0	0	0	0	0	0	0	bPCR
Homo_sapiens	Asia	Terrangganu	Malaysia	13	13	13	0	0	0	100	0	0	0	13	0	0	0	0	0	0	0	0	0	0	0	0	0	0	0	0	0	0	0	0	0	0	0	0	0	0	0	0	0	0	0	0	0	0	bPCR
Homo_sapiens	Asia	Sabah	Malaysia	21	21	21	0	0	0	100	0	0	0	21	0	0	0	0	0	0	0	0	0	0	0	0	0	0	0	0	0	0	0	0	0	0	0	0	0	0	0	0	0	0	0	0	0	0	bPCR
Homo_sapiens	Asia	Kuala Lampur	Malaysia	5	5	5	0	0	0	100	0	0	0	5	0	0	0	0	0	0	0	0	0	0	0	0	0	0	0	0	0	0	0	0	0	0	0	0	0	0	0	0	0	0	0	0	0	0	bPCR
Homo_sapiens	Asia	Kudat	Malaysia	54759	107	107	0	0	54652	0.2	0	0	0	107	0	0	0	0	0	0	0	0	0	0	0	0	0	0	0	0	0	0	0	0	0	0	0	0	0	0	0	0	0	0	0	0	0	0	bPCR
Homo_sapiens	Asia	Attapeu Province	Laos	1	1	1	0	0	0	100	0	0	0	1	0	0	0	0	0	0	0	0	0	0	0	0	0	0	0	0	0	0	0	0	0	0	0	0	0	0	0	0	0	0	0	0	0	0	bPCR
Homo_sapiens	Asia	Central Kalimantan	Indonesia	1	1	1	0	0	0	100	0	0	0	1	0	0	0	0	0	0	0	0	0	0	0	0	0	0	0	0	0	0	0	0	0	0	0	0	0	0	0	0	0	0	0	0	0	0	bPCR
Homo_sapiens	Asia	North Sumatra	Indonesia	1270	320	320	0	0	950	25.2	0	0	0	114	0	0	0	0	0	0	0	0	0	0	0	0	0	0	0	0	0	0	54	0	0	0	0	0	10	0	93	0	0	0	0	0	49	0	bPCR
Homo_sapiens	Asia	North Sumatra	Indonesia	544	182	182	0	0	362	33.5	0	0	0	20	0	0	0	0	0	0	0	0	0	0	0	0	0	0	0	0	0	0	70	0	0	0	0	0	3	0	62	0	0	0	0	0	27	0	bPCR
Homo_sapiens	Asia	Pulau Nias	Indonesia	1917	667	667	0	0	1250	34.8	0	0	0	120	0	0	0	0	0	0	0	0	0	0	0	0	0	0	0	0	0	0	123	0	0	0	0	0	27	0	180	0	0	0	0	0	217	0	bPCR
Homo_sapiens	Asia	Songkhla Province	Malaysia	5	5	5	5	0	0	100	0	0	0	5	0	0	0	0	0	0	0	0	0	0	0	0	0	0	0	0	0	0	0	0	0	0	0	0	0	0	0	0	0	0	0	0	0	0	bPCR
Homo_sapiens	Asia	Narathiwat Province	Malaysia	1	1	1	1	0	0	100	0	0	0	1	0	0	0	0	0	0	0	0	0	0	0	0	0	0	0	0	0	0	0	0	0	0	0	0	0	0	0	0	0	0	0	0	0	0	bPCR
Homo_sapiens	Asia	Kuala Lampur	Malaysia	15	15	15	0	0	0	100	0	0	0	15	0	0	0	0	0	0	0	0	0	0	0	0	0	0	0	0	0	0	0	0	0	0	0	0	0	0	0	0	0	0	0	0	0	0	bPCR
Homo_sapiens	Asia	Borneo Sabah	Malaysia	320	320	320	0	0	0	100	0	0	0	229	0	0	0	0	0	0	0	0	0	0	0	0	0	0	0	0	0	0	32	0	0	0	0	0	10	0	48	0	0	0	0	0	1	0	bPCR
Homo_sapiens	Asia	Palawan	Philippine	546	6	6	0	0	0	1.1	0	0	0	6	0	0	0	0	0	0	0	0	0	0	0	0	0	0	0	0	0	0	0	0	0	0	0	0	0	0	0	0	0	0	0	0	0	0	bPCR
Homo_sapiens	Asia	Mainland Kudat	Malaysia	1162	79	79	0	0	0	6.8	0	0	0	79	0	0	0	0	0	0	0	0	0	0	0	0	0	0	0	0	0	0	0	0	0	0	0	0	0	0	0	0	0	0	0	0	0	0	bPCR
Homo_sapiens	Asia	Pulau Banggi	Malaysia	795	93	93	0	0	0	11.7	0	0	0	93	0	0	0	0	0	0	0	0	0	0	0	0	0	0	0	0	0	0	0	0	0	0	0	0	0	0	0	0	0	0	0	0	0	0	bPCR
Homo_sapiens	Asia	Papua	Indonesia	143	119	119	0	0	24	83.2	0	0	0	0	0	0	0	0	0	0	0	0	0	0	0	0	0	0	0	0	0	0	55	0	0	0	0	0	14	0	38	0	0	0	0	0	12	0	bPCR
Homo_sapiens	Asia	Sabah	Malaysia	233	205	205	0	0	28	87.9	0	0	0	106	0	0	0	0	0	0	0	0	0	0	0	0	0	0	0	0	0	0	14	0	0	0	0	0	0	0	85	0	0	0	0	0	0	0	bPCR
Homo_sapiens	Asia	Sabah	Malaysia	326	326	326	0	0	0	100	0	0	0	146	0	0	0	0	0	0	0	0	0	0	0	0	0	0	0	0	0	0	130	0	0	0	0	0	0	0	0	0	0	0	0	0	0	0	bPCR
Homo_sapiens	Asia	Sumatra	Indonesia	1	1	1	0	0	0	100	0	0	0	1	0	0	0	0	0	0	0	0	0	0	0	0	0	0	0	0	0	0	0	0	0	0	0	0	0	0	0	0	0	0	0	0	0	0	bPCR
Homo_sapiens	Asia	Sabah	Malaysia	749	749	749	0	0	0	100	0	0	0	481	0	0	0	0	0	0	0	0	0	0	0	0	0	0	0	0	0	0	96	0	0	0	0	0	0	0	172	0	0	0	0	0	0	0	bPCR
Homo_sapiens	Asia	Sabah	Malaysia	172	172	172	0	0	0	100	0	0	0	82	0	0	0	0	0	0	0	0	0	0	0	0	0	0	0	0	0	0	90	0	0	0	0	0	0	0	0	0	0	0	0	0	0	0	bPCR
Homo_sapiens	Asia	Sabah	Malaysia	101	101	101	0	0	0	100	0	0	0	46	0	0	0	0	0	0	0	0	0	0	0	0	0	0	0	0	0	0	42	0	0	0	0	0	2	0	10	0	0	0	0	0	1	0	bPCR
Homo_sapiens	Asia	Aceh, Sumatra	Indonesia	41	41	41	0	0	0	100	0	0	0	19	0	0	0	0	0	0	0	0	0	0	0	0	0	0	0	0	0	0	8	0	0	0	0	0	0	0	14	0	0	0	0	0	0	0	bPCR
Homo_sapiens	Asia	Aceh, Sumatra	Indonesia	1534	43	43	0	0	0	2.8	0	0	0	20	0	0	0	0	0	0	0	0	0	0	0	0	0	0	0	0	0	0	8	0	0	0	0	0	0	0	15	0	0	0	0	0	0	0	bPCR
Homo_sapiens	Asia	Padawan	Philippine	1	1	1	0	0	0	100	0	0	0	1	0	0	0	0	0	0	0	0	0	0	0	0	0	0	0	0	0	0	0	0	0	0	0	0	0	0	0	0	0	0	0	0	0	0	bPCR
Homo_sapiens	Asia	Kapit, Sarawak	Malaysia	110	110	110	0	0	0	100	0	1	0	96	0	0	0	0	0	0	0	0	0	0	0	0	0	0	0	0	0	0	9	0	0	0	0	0	0	1	4	0	0	0	0	0	1	0	bPCR
Homo_sapiens	Asia	Kapit, Sarawak	Malaysia	210	210	210	0	0	0	100	0	0	0	176	0	0	0	0	0	0	0	0	0	0	0	0	0	0	0	0	0	0	14	0	0	0	0	0	4	3	12	0	0	0	0	0	1	0	bPCR
Homo_sapiens	Asia	Kapit, Sarawak	Malaysia	154	154	154	0	0	0	100	0	0	0	109	0	0	0	0	0	0	0	0	0	0	0	0	0	0	0	0	0	0	16	0	0	0	0	0	1	0	16	0	0	0	0	0	10	0	bPCR
Homo_sapiens	Asia	Kapit, Sarawak	Malaysia	237	237	237	0	0	0	100	0	1	0	158	0	0	0	0	0	0	0	0	0	0	0	0	0	0	0	0	0	0	41	0	0	0	0	0	0	1	14	0	0	0	0	0	22	0	bPCR
Homo_sapiens	Asia	Kapit, Sarawak	Malaysia	336	336	336	0	0	0	100	0	4	0	282	0	0	0	0	0	0	0	0	0	0	0	0	0	0	0	0	0	0	26	0	0	0	0	0	3	2	19	0	0	0	0	0	4	0	bPCR
Homo_sapiens	Asia	Sarawak	Malaysia	79	79	79	0	0	0	100	0	0	0	79	0	0	0	0	0	0	0	0	0	0	0	0	0	0	0	0	0	0	0	0	0	0	0	0	0	0	0	0	0	0	0	0	0	0	bPCR
Homo_sapiens	Asia	NA	Malaysia	11	11	11	0	0	0	100	0	0	0	11	0	0	0	0	0	0	0	0	0	0	0	0	0	0	0	0	0	0	0	0	0	0	0	0	0	0	0	0	0	0	0	0	0	0	bPCR
Homo_sapiens	Asia	NA	Malaysia	23	23	23	0	0	0	100	0	0	0	23	0	0	0	0	0	0	0	0	0	0	0	0	0	0	0	0	0	0	0	0	0	0	0	0	0	0	0	0	0	0	0	0	0	0	bPCR
Homo_sapiens	Asia	NA	Malaysia	32	32	32	0	0	0	100	0	0	0	32	0	0	0	0	0	0	0	0	0	0	0	0	0	0	0	0	0	0	0	0	0	0	0	0	0	0	0	0	0	0	0	0	0	0	bPCR
Homo_sapiens	Asia	Palawan	Philippine	1	1	1	0	0	0	100	0	0	0	1	0	0	0	0	0	0	0	0	0	0	0	0	0	0	0	0	0	0	0	0	0	0	0	0	0	0	0	0	0	0	0	0	0	0	bPCR
Homo_sapiens	Asia	Lamphun	Thailand	1	1	1	0	0	0	100	0	0	0	1	0	0	0	0	0	0	0	0	0	0	0	0	0	0	0	0	0	0	0	0	0	0	0	0	0	0	0	0	0	0	0	0	0	0	bPCR
Homo_sapiens	Asia	Krabi	Thailand	1	1	1	0	0	0	100	0	0	0	1	0	0	0	0	0	0	0	0	0	0	0	0	0	0	0	0	0	0	0	0	0	0	0	0	0	0	0	0	0	0	0	0	0	0	bPCR
Homo_sapiens	Asia	Phang NGA	Thailand	1	1	1	0	0	0	100	0	0	0	1	0	0	0	0	0	0	0	0	0	0	0	0	0	0	0	0	0	0	0	0	0	0	0	0	0	0	0	0	0	0	0	0	0	0	bPCR
Homo_sapiens	Asia	Phuket	Thailand	2	2	2	0	0	0	100	0	0	0	2	0	0	0	0	0	0	0	0	0	0	0	0	0	0	0	0	0	0	0	0	0	0	0	0	0	0	0	0	0	0	0	0	0	0	bPCR
Homo_sapiens	Asia	Bangkok	Thailand	1	1	1	0	0	0	100	0	0	0	1	0	0	0	0	0	0	0	0	0	0	0	0	0	0	0	0	0	0	0	0	0	0	0	0	0	0	0	0	0	0	0	0	0	0	bPCR
Homo_sapiens	Asia	Koh-Chang Island	Thailand	1	1	1	0	0	0	100	0	0	0	1	0	0	0	0	0	0	0	0	0	0	0	0	0	0	0	0	0	0	0	0	0	0	0	0	0	0	0	0	0	0	0	0	0	0	bPCR
Homo_sapiens	Asia	Beaufort District, Sabah	Malaysia	8	8	8	0	0	0	100	0	0	0	8	0	0	0	0	0	0	0	0	0	0	0	0	0	0	0	0	0	0	0	0	0	0	0	0	0	0	0	0	0	0	0	0	0	0	bPCR
Homo_sapiens	Asia	Beaufort District, Sabah	Malaysia	6	6	6	0	0	0	100	0	0	0	6	0	0	0	0	0	0	0	0	0	0	0	0	0	0	0	0	0	0	0	0	0	0	0	0	0	0	0	0	0	0	0	0	0	0	bPCR
Homo_sapiens	Asia	Beaufort District, Sabah	Malaysia	13	13	13	0	0	0	100	0	0	0	13	0	0	0	0	0	0	0	0	0	0	0	0	0	0	0	0	0	0	0	0	0	0	0	0	0	0	0	0	0	0	0	0	0	0	bPCR
Homo_sapiens	Asia	Keningau District, Sabah	Malaysia	86	86	86	0	0	0	100	0	0	0	86	0	0	0	0	0	0	0	0	0	0	0	0	0	0	0	0	0	0	0	0	0	0	0	0	0	0	0	0	0	0	0	0	0	0	bPCR
Homo_sapiens	Asia	Keningau District, Sabah	Malaysia	107	107	107	0	0	0	100	0	0	0	107	0	0	0	0	0	0	0	0	0	0	0	0	0	0	0	0	0	0	0	0	0	0	0	0	0	0	0	0	0	0	0	0	0	0	bPCR
Homo_sapiens	Asia	Keningau District, Sabah	Malaysia	479	479	479	0	0	0	100	0	0	0	479	0	0	0	0	0	0	0	0	0	0	0	0	0	0	0	0	0	0	0	0	0	0	0	0	0	0	0	0	0	0	0	0	0	0	bPCR
Homo_sapiens	Asia	Nabawan District, Sabah	Malaysia	37	37	37	0	0	0	100	0	0	0	37	0	0	0	0	0	0	0	0	0	0	0	0	0	0	0	0	0	0	0	0	0	0	0	0	0	0	0	0	0	0	0	0	0	0	bPCR
Homo_sapiens	Asia	Nabawan District, Sabah	Malaysia	62	62	62	0	0	0	100	0	0	0	62	0	0	0	0	0	0	0	0	0	0	0	0	0	0	0	0	0	0	0	0	0	0	0	0	0	0	0	0	0	0	0	0	0	0	bPCR
Homo_sapiens	Asia	Nabawan District, Sabah	Malaysia	53	53	53	0	0	0	100	0	0	0	53	0	0	0	0	0	0	0	0	0	0	0	0	0	0	0	0	0	0	0	0	0	0	0	0	0	0	0	0	0	0	0	0	0	0	bPCR
Homo_sapiens	Asia	Sipitang District, Sabah	Malaysia	47	47	47	0	0	0	100	0	0	0	47	0	0	0	0	0	0	0	0	0	0	0	0	0	0	0	0	0	0	0	0	0	0	0	0	0	0	0	0	0	0	0	0	0	0	bPCR
Homo_sapiens	Asia	Sipitang District, Sabah	Malaysia	56	56	56	0	0	0	100	0	0	0	56	0	0	0	0	0	0	0	0	0	0	0	0	0	0	0	0	0	0	0	0	0	0	0	0	0	0	0	0	0	0	0	0	0	0	bPCR
Homo_sapiens	Asia	Sipitang District, Sabah	Malaysia	65	65	65	0	0	0	100	0	0	0	65	0	0	0	0	0	0	0	0	0	0	0	0	0	0	0	0	0	0	0	0	0	0	0	0	0	0	0	0	0	0	0	0	0	0	bPCR
Homo_sapiens	Asia	Tambunam District, Sabah	Malaysia	33	33	33	0	0	0	100	0	0	0	33	0	0	0	0	0	0	0	0	0	0	0	0	0	0	0	0	0	0	0	0	0	0	0	0	0	0	0	0	0	0	0	0	0	0	bPCR
Homo_sapiens	Asia	Tambunam District, Sabah	Malaysia	25	25	25	0	0	0	100	0	0	0	25	0	0	0	0	0	0	0	0	0	0	0	0	0	0	0	0	0	0	0	0	0	0	0	0	0	0	0	0	0	0	0	0	0	0	bPCR
Homo_sapiens	Asia	Tambunam District, Sabah	Malaysia	97	97	97	0	0	0	100	0	0	0	97	0	0	0	0	0	0	0	0	0	0	0	0	0	0	0	0	0	0	0	0	0	0	0	0	0	0	0	0	0	0	0	0	0	0	bPCR
Homo_sapiens	Asia	Tenom District, Sabah	Malaysia	98	98	98	0	0	0	100	0	0	0	98	0	0	0	0	0	0	0	0	0	0	0	0	0	0	0	0	0	0	0	0	0	0	0	0	0	0	0	0	0	0	0	0	0	0	bPCR
Homo_sapiens	Asia	Tenom District, Sabah	Malaysia	79	79	79	0	0	0	100	0	0	0	79	0	0	0	0	0	0	0	0	0	0	0	0	0	0	0	0	0	0	0	0	0	0	0	0	0	0	0	0	0	0	0	0	0	0	bPCR
Homo_sapiens	Asia	Tenom District, Sabah	Malaysia	209	209	209	0	0	0	100	0	0	0	209	0	0	0	0	0	0	0	0	0	0	0	0	0	0	0	0	0	0	0	0	0	0	0	0	0	0	0	0	0	0	0	0	0	0	bPCR
Homo_sapiens	Asia	Kota Marudu District, Sabah	Malaysia	50	50	50	0	0	0	100	0	0	0	50	0	0	0	0	0	0	0	0	0	0	0	0	0	0	0	0	0	0	0	0	0	0	0	0	0	0	0	0	0	0	0	0	0	0	bPCR
Homo_sapiens	Asia	Kota Marudu District, Sabah	Malaysia	32	32	32	0	0	0	100	0	0	0	32	0	0	0	0	0	0	0	0	0	0	0	0	0	0	0	0	0	0	0	0	0	0	0	0	0	0	0	0	0	0	0	0	0	0	bPCR
Homo_sapiens	Asia	Kota Marudu District, Sabah	Malaysia	153	153	153	0	0	0	100	0	0	0	153	0	0	0	0	0	0	0	0	0	0	0	0	0	0	0	0	0	0	0	0	0	0	0	0	0	0	0	0	0	0	0	0	0	0	bPCR
Homo_sapiens	Asia	Kudat District, Sabah	Malaysia	49	49	49	0	0	0	100	0	0	0	49	0	0	0	0	0	0	0	0	0	0	0	0	0	0	0	0	0	0	0	0	0	0	0	0	0	0	0	0	0	0	0	0	0	0	bPCR
Homo_sapiens	Asia	Kudat District, Sabah	Malaysia	13	13	13	0	0	0	100	0	0	0	13	0	0	0	0	0	0	0	0	0	0	0	0	0	0	0	0	0	0	0	0	0	0	0	0	0	0	0	0	0	0	0	0	0	0	bPCR
Homo_sapiens	Asia	Kudat District, Sabah	Malaysia	123	123	123	0	0	0	100	0	0	0	123	0	0	0	0	0	0	0	0	0	0	0	0	0	0	0	0	0	0	0	0	0	0	0	0	0	0	0	0	0	0	0	0	0	0	bPCR
Homo_sapiens	Asia	Pitas District, Sabah	Malaysia	46	46	46	0	0	0	100	0	0	0	46	0	0	0	0	0	0	0	0	0	0	0	0	0	0	0	0	0	0	0	0	0	0	0	0	0	0	0	0	0	0	0	0	0	0	bPCR
Homo_sapiens	Asia	Pitas District, Sabah	Malaysia	19	19	19	0	0	0	100	0	0	0	19	0	0	0	0	0	0	0	0	0	0	0	0	0	0	0	0	0	0	0	0	0	0	0	0	0	0	0	0	0	0	0	0	0	0	bPCR
Homo_sapiens	Asia	Pitas District, Sabah	Malaysia	48	48	48	0	0	0	100	0	0	0	48	0	0	0	0	0	0	0	0	0	0	0	0	0	0	0	0	0	0	0	0	0	0	0	0	0	0	0	0	0	0	0	0	0	0	bPCR
Homo_sapiens	Asia	Beluran District, Sabah	Malaysia	46	46	46	0	0	0	100	0	0	0	46	0	0	0	0	0	0	0	0	0	0	0	0	0	0	0	0	0	0	0	0	0	0	0	0	0	0	0	0	0	0	0	0	0	0	bPCR
Homo_sapiens	Asia	Beluran District, Sabah	Malaysia	14	14	14	0	0	0	100	0	0	0	14	0	0	0	0	0	0	0	0	0	0	0	0	0	0	0	0	0	0	0	0	0	0	0	0	0	0	0	0	0	0	0	0	0	0	bPCR
Homo_sapiens	Asia	Beluran District, Sabah	Malaysia	76	76	76	0	0	0	100	0	0	0	76	0	0	0	0	0	0	0	0	0	0	0	0	0	0	0	0	0	0	0	0	0	0	0	0	0	0	0	0	0	0	0	0	0	0	bPCR
Homo_sapiens	Asia	Kinabatangan District, Sabah	Malaysia	19	19	19	0	0	0	100	0	0	0	19	0	0	0	0	0	0	0	0	0	0	0	0	0	0	0	0	0	0	0	0	0	0	0	0	0	0	0	0	0	0	0	0	0	0	bPCR
Homo_sapiens	Asia	Kinabatangan District, Sabah	Malaysia	14	14	14	0	0	0	100	0	0	0	14	0	0	0	0	0	0	0	0	0	0	0	0	0	0	0	0	0	0	0	0	0	0	0	0	0	0	0	0	0	0	0	0	0	0	bPCR
Homo_sapiens	Asia	Kinabatangan District, Sabah	Malaysia	27	27	27	0	0	0	100	0	0	0	27	0	0	0	0	0	0	0	0	0	0	0	0	0	0	0	0	0	0	0	0	0	0	0	0	0	0	0	0	0	0	0	0	0	0	bPCR
Homo_sapiens	Asia	Sandakan District, Sabah	Malaysia	2	2	2	0	0	0	100	0	0	0	2	0	0	0	0	0	0	0	0	0	0	0	0	0	0	0	0	0	0	0	0	0	0	0	0	0	0	0	0	0	0	0	0	0	0	bPCR
Homo_sapiens	Asia	Sandakan District, Sabah	Malaysia	15	15	15	0	0	0	100	0	0	0	15	0	0	0	0	0	0	0	0	0	0	0	0	0	0	0	0	0	0	0	0	0	0	0	0	0	0	0	0	0	0	0	0	0	0	bPCR
Homo_sapiens	Asia	Sandakan District, Sabah	Malaysia	35	35	35	0	0	0	100	0	0	0	35	0	0	0	0	0	0	0	0	0	0	0	0	0	0	0	0	0	0	0	0	0	0	0	0	0	0	0	0	0	0	0	0	0	0	bPCR
Homo_sapiens	Asia	Tongod District, Sabah	Malaysia	38	38	38	0	0	0	100	0	0	0	38	0	0	0	0	0	0	0	0	0	0	0	0	0	0	0	0	0	0	0	0	0	0	0	0	0	0	0	0	0	0	0	0	0	0	bPCR
Homo_sapiens	Asia	Tongod District, Sabah	Malaysia	25	25	25	0	0	0	100	0	0	0	25	0	0	0	0	0	0	0	0	0	0	0	0	0	0	0	0	0	0	0	0	0	0	0	0	0	0	0	0	0	0	0	0	0	0	bPCR
Homo_sapiens	Asia	Tongod District, Sabah	Malaysia	25	25	25	0	0	0	100	0	0	0	25	0	0	0	0	0	0	0	0	0	0	0	0	0	0	0	0	0	0	0	0	0	0	0	0	0	0	0	0	0	0	0	0	0	0	bPCR
Homo_sapiens	Asia	Kunak District, Sabah	Malaysia	10	10	10	0	0	0	100	0	0	0	10	0	0	0	0	0	0	0	0	0	0	0	0	0	0	0	0	0	0	0	0	0	0	0	0	0	0	0	0	0	0	0	0	0	0	bPCR
Homo_sapiens	Asia	Kunak District, Sabah	Malaysia	10	10	10	0	0	0	100	0	0	0	10	0	0	0	0	0	0	0	0	0	0	0	0	0	0	0	0	0	0	0	0	0	0	0	0	0	0	0	0	0	0	0	0	0	0	bPCR
Homo_sapiens	Asia	Kunak District, Sabah	Malaysia	5	5	5	0	0	0	100	0	0	0	5	0	0	0	0	0	0	0	0	0	0	0	0	0	0	0	0	0	0	0	0	0	0	0	0	0	0	0	0	0	0	0	0	0	0	bPCR
Homo_sapiens	Asia	Lahad Datu District, Sabah	Malaysia	38	38	38	0	0	0	100	0	0	0	38	0	0	0	0	0	0	0	0	0	0	0	0	0	0	0	0	0	0	0	0	0	0	0	0	0	0	0	0	0	0	0	0	0	0	bPCR
Homo_sapiens	Asia	Lahad Datu District, Sabah	Malaysia	33	33	33	0	0	0	100	0	0	0	33	0	0	0	0	0	0	0	0	0	0	0	0	0	0	0	0	0	0	0	0	0	0	0	0	0	0	0	0	0	0	0	0	0	0	bPCR
Homo_sapiens	Asia	Lahad Datu District, Sabah	Malaysia	78	78	78	0	0	0	100	0	0	0	78	0	0	0	0	0	0	0	0	0	0	0	0	0	0	0	0	0	0	0	0	0	0	0	0	0	0	0	0	0	0	0	0	0	0	bPCR
Homo_sapiens	Asia	Semporna District, Sabah	Malaysia	4	4	4	0	0	0	100	0	0	0	4	0	0	0	0	0	0	0	0	0	0	0	0	0	0	0	0	0	0	0	0	0	0	0	0	0	0	0	0	0	0	0	0	0	0	bPCR
Homo_sapiens	Asia	Semporna District, Sabah	Malaysia	1	1	1	0	0	0	100	0	0	0	1	0	0	0	0	0	0	0	0	0	0	0	0	0	0	0	0	0	0	0	0	0	0	0	0	0	0	0	0	0	0	0	0	0	0	bPCR
Homo_sapiens	Asia	Semporna District, Sabah	Malaysia	3	3	3	0	0	0	100	0	0	0	3	0	0	0	0	0	0	0	0	0	0	0	0	0	0	0	0	0	0	0	0	0	0	0	0	0	0	0	0	0	0	0	0	0	0	bPCR
Homo_sapiens	Asia	Tawau District, Sabah	Malaysia	41	41	41	0	0	0	100	0	0	0	41	0	0	0	0	0	0	0	0	0	0	0	0	0	0	0	0	0	0	0	0	0	0	0	0	0	0	0	0	0	0	0	0	0	0	bPCR
Homo_sapiens	Asia	Tawau District, Sabah	Malaysia	40	40	40	0	0	0	100	0	0	0	40	0	0	0	0	0	0	0	0	0	0	0	0	0	0	0	0	0	0	0	0	0	0	0	0	0	0	0	0	0	0	0	0	0	0	bPCR
Homo_sapiens	Asia	Tawau District, Sabah	Malaysia	57	57	57	0	0	0	100	0	0	0	57	0	0	0	0	0	0	0	0	0	0	0	0	0	0	0	0	0	0	0	0	0	0	0	0	0	0	0	0	0	0	0	0	0	0	bPCR
Homo_sapiens	Asia	Kota Belud District, Sabah	Malaysia	14	14	14	0	0	0	100	0	0	0	14	0	0	0	0	0	0	0	0	0	0	0	0	0	0	0	0	0	0	0	0	0	0	0	0	0	0	0	0	0	0	0	0	0	0	bPCR
Homo_sapiens	Asia	Kota Belud District, Sabah	Malaysia	7	7	7	0	0	0	100	0	0	0	7	0	0	0	0	0	0	0	0	0	0	0	0	0	0	0	0	0	0	0	0	0	0	0	0	0	0	0	0	0	0	0	0	0	0	bPCR
Homo_sapiens	Asia	Kota Belud District, Sabah	Malaysia	62	62	62	0	0	0	100	0	0	0	62	0	0	0	0	0	0	0	0	0	0	0	0	0	0	0	0	0	0	0	0	0	0	0	0	0	0	0	0	0	0	0	0	0	0	bPCR
Homo_sapiens	Asia	Kota Kinabalu District, Sabah	Malaysia	1	1	1	0	0	0	100	0	0	0	1	0	0	0	0	0	0	0	0	0	0	0	0	0	0	0	0	0	0	0	0	0	0	0	0	0	0	0	0	0	0	0	0	0	0	bPCR
Homo_sapiens	Asia	Kota Kinabalu District, Sabah	Malaysia	10	10	10	0	0	0	100	0	0	0	10	0	0	0	0	0	0	0	0	0	0	0	0	0	0	0	0	0	0	0	0	0	0	0	0	0	0	0	0	0	0	0	0	0	0	bPCR
Homo_sapiens	Asia	Kota Kinabalu District, Sabah	Malaysia	15	15	15	0	0	0	100	0	0	0	15	0	0	0	0	0	0	0	0	0	0	0	0	0	0	0	0	0	0	0	0	0	0	0	0	0	0	0	0	0	0	0	0	0	0	bPCR
Homo_sapiens	Asia	Papar District, Sabah	Malaysia	18	18	18	0	0	0	100	0	0	0	18	0	0	0	0	0	0	0	0	0	0	0	0	0	0	0	0	0	0	0	0	0	0	0	0	0	0	0	0	0	0	0	0	0	0	bPCR
Homo_sapiens	Asia	Papar District, Sabah	Malaysia	7	7	7	0	0	0	100	0	0	0	7	0	0	0	0	0	0	0	0	0	0	0	0	0	0	0	0	0	0	0	0	0	0	0	0	0	0	0	0	0	0	0	0	0	0	bPCR
Homo_sapiens	Asia	Papar District, Sabah	Malaysia	15	15	15	0	0	0	100	0	0	0	15	0	0	0	0	0	0	0	0	0	0	0	0	0	0	0	0	0	0	0	0	0	0	0	0	0	0	0	0	0	0	0	0	0	0	bPCR
Homo_sapiens	Asia	Penampang	Malaysia	7	7	7	0	0	0	100	0	0	0	7	0	0	0	0	0	0	0	0	0	0	0	0	0	0	0	0	0	0	0	0	0	0	0	0	0	0	0	0	0	0	0	0	0	0	bPCR
Homo_sapiens	Asia	Penampang	Malaysia	8	8	8	0	0	0	100	0	0	0	8	0	0	0	0	0	0	0	0	0	0	0	0	0	0	0	0	0	0	0	0	0	0	0	0	0	0	0	0	0	0	0	0	0	0	bPCR
Homo_sapiens	Asia	Penampang	Malaysia	16	16	16	0	0	0	100	0	0	0	16	0	0	0	0	0	0	0	0	0	0	0	0	0	0	0	0	0	0	0	0	0	0	0	0	0	0	0	0	0	0	0	0	0	0	bPCR
Homo_sapiens	Asia	Ranau District, Sabah	Malaysia	114	114	114	0	0	0	100	0	0	0	114	0	0	0	0	0	0	0	0	0	0	0	0	0	0	0	0	0	0	0	0	0	0	0	0	0	0	0	0	0	0	0	0	0	0	bPCR
Homo_sapiens	Asia	Ranau District, Sabah	Malaysia	89	89	89	0	0	0	100	0	0	0	89	0	0	0	0	0	0	0	0	0	0	0	0	0	0	0	0	0	0	0	0	0	0	0	0	0	0	0	0	0	0	0	0	0	0	bPCR
Homo_sapiens	Asia	Ranau District, Sabah	Malaysia	358	358	358	0	0	0	100	0	0	0	358	0	0	0	0	0	0	0	0	0	0	0	0	0	0	0	0	0	0	0	0	0	0	0	0	0	0	0	0	0	0	0	0	0	0	bPCR
Homo_sapiens	Asia	Tuaran District, Sabah	Malaysia	11	11	11	0	0	0	100	0	0	0	11	0	0	0	0	0	0	0	0	0	0	0	0	0	0	0	0	0	0	0	0	0	0	0	0	0	0	0	0	0	0	0	0	0	0	bPCR
Homo_sapiens	Asia	Tuaran District, Sabah	Malaysia	5	5	5	0	0	0	100	0	0	0	5	0	0	0	0	0	0	0	0	0	0	0	0	0	0	0	0	0	0	0	0	0	0	0	0	0	0	0	0	0	0	0	0	0	0	bPCR
Homo_sapiens	Asia	Tuaran District, Sabah	Malaysia	18	18	18	0	0	0	100	0	0	0	18	0	0	0	0	0	0	0	0	0	0	0	0	0	0	0	0	0	0	0	0	0	0	0	0	0	0	0	0	0	0	0	0	0	0	bPCR
Homo_sapiens	Asia	Betong Division, Sarawak	Malaysia	3002	8	8	0	0	2994	0.26	0	0	0	7	0	0	0	0	0	0	0	0	0	0	0	0	0	0	0	0	0	0	0	0	0	0	0	0	0	0	1	0	0	0	0	0	0	0	bPCR
Homo_sapiens	Asia	Kelatan	Malaysia	1	1	0	1	0	0	100	0	0	0	1	0	0	0	0	0	0	0	0	0	0	0	0	0	0	0	0	0	0	0	0	0	0	0	0	0	0	0	0	0	0	0	0	0	0	bPCR
Homo_sapiens	Asia	NA	Malaysia	201	134	134	0	0	67	66.7	0	0	0	58	0	0	0	0	0	0	0	0	0	0	0	0	0	0	0	0	0	0	31	0	0	0	0	0	1	1	39	0	0	0	0	0	4	0	bPCR
Homo_sapiens	Asia	Johor	Malaysia	1	1	1	0	0	0	100	0	0	0	1	0	0	0	0	0	0	0	0	0	0	0	0	0	0	0	0	0	0	0	0	0	0	0	0	0	0	0	0	0	0	0	0	0	0	bPCR
Homo_sapiens	Asia	Kota Marudu District, Sabah	Malaysia	457	41	41	0	0	416	9	0	0	0	41	0	0	0	0	0	0	0	0	0	0	0	0	0	0	0	0	0	0	0	0	0	0	0	0	0	0	0	0	0	0	0	0	0	0	bPCR
Homo_sapiens	Asia	Kudat District, Sabah	Malaysia	690	43	43	0	0	647	6.2	0	0	0	43	0	0	0	0	0	0	0	0	0	0	0	0	0	0	0	0	0	0	0	0	0	0	0	0	0	0	0	0	0	0	0	0	0	0	bPCR
Homo_sapiens	Asia	Kudat District, Sabah	Malaysia	1	1	1	0	0	0	100	0	0	0	1	0	0	0	0	0	0	0	0	0	0	0	0	0	0	0	0	0	0	0	0	0	0	0	0	0	0	0	0	0	0	0	0	0	0	bPCR
Homo_sapiens	Asia	Sabah	Malaysia	1222	410	0	0	0	812	33.5	0	0	0	340	0	0	0	0	0	0	0	0	0	0	0	0	0	0	0	0	0	0	23	0	0	0	0	0	41	0	3	0	0	0	0	0	3	0	bPCR
Homo_sapiens	Asia	Bago Region	Myanmar	1638	41	41	0	0	1597	2.5	0	0	0	15	0	0	0	0	0	0	0	0	0	0	0	0	0	0	0	0	0	0	18	0	0	0	0	0	1	0	5	0	0	0	0	0	2	0	bPCR
Homo_sapiens	Asia	Sabah	Malaysia	1	1	1	0	0	0	100	0	0	0	1	0	0	0	0	0	0	0	0	0	0	0	0	0	0	0	0	0	0	0	0	0	0	0	0	0	0	0	0	0	0	0	0	0	0	bPCR
Homo_sapiens	Asia	Sabah	Malaysia	129	109	109	0	0	20	84.4	0	0	0	67	0	0	0	0	0	0	0	0	0	0	0	0	0	0	0	0	0	0	16	0	0	0	0	0	10	0	9	0	0	0	0	0	0	0	bPCR
Homo_sapiens	Asia	Surat Thani	Thailand	1	1	1	0	0	0	100	0	1	0	0	0	0	0	0	0	0	0	0	0	0	0	0	0	0	0	0	0	0	0	0	0	0	0	0	0	0	0	0	0	0	0	0	0	0	bPCR
Homo_sapiens	America	Rio de Janeiro	Brazil	39	39	39	0	0	0	100	0	0	0	0	0	0	0	0	0	0	0	0	0	28	0	0	0	0	0	0	0	0	0	0	0	0	0	0	0	0	0	0	0	0	0	0	0	11	bPCR
[truncated: 4 more columns]
